# Supplementary material for: The influence of thermal coupling and diffusion on the importance of reactions: The case study of hydrogen–air combustion
Source: Royal Society of Chemistry journal article supplement (doi:10.1039/b303628f), 2003-01-01
Supplement: tables1.pdf [file tables1.pdf]

| 2.0 |     |     |     |      |      |      |      |      |      |      |      |      | 4.0  |      |     |     |     |     |      |      |      |      |      |      |        |        |                     |    |
|-----|-----|-----|-----|------|------|------|------|------|------|------|------|------|------|------|-----|-----|-----|-----|------|------|------|------|------|------|--------|--------|---------------------|----|
| 600 | 700 | 800 | 900 | 1000 | 1100 | 1200 | 1300 | 1400 | 1500 | 1600 | 1700 | 1800 | 1900 | 2000 | 600 | 700 | 800 | 900 | 1000 | 1100 | 1200 | 1300 | 1400 | 1500 | Z1     | Z2     |                     |    |
|     |     |     |     |      |      |      |      |      |      |      |      |      |      |      |     |     |     |     |      |      |      |      |      |      | Z1     | Z2     | H2+O => OH+H        | 1  |
|     |     |     |     |      |      |      |      |      |      |      |      |      |      |      |     |     |     |     |      |      |      |      |      |      | Z3, Z5 | Z4, Z6 |                     |    |
|     |     |     |     |      |      |      |      |      |      |      |      |      |      |      |     |     |     |     |      |      |      |      |      |      | Z1     | Z2     | OH+H => H2+O        | 2  |
|     |     |     |     |      |      |      |      |      |      |      |      |      |      |      |     |     |     |     |      |      |      |      |      |      | Z3, Z5 | Z4, Z6 |                     |    |
|     |     |     |     |      |      |      |      |      |      |      |      |      |      |      |     |     |     |     |      |      |      |      |      |      | Z1     | Z2     | H2O+H => H2+OH      | 3  |
|     |     |     |     |      |      |      |      |      |      |      |      |      |      |      |     |     |     |     |      |      |      |      |      |      | Z3, Z5 | Z4, Z6 |                     |    |
|     |     |     |     |      |      |      |      |      |      |      |      |      |      |      |     |     |     |     |      |      |      |      |      |      | Z1     | Z2     | H2+OH => H2O+H      | 4  |
|     |     |     |     |      |      |      |      |      |      |      |      |      |      |      |     |     |     |     |      |      |      |      |      |      | Z3, Z5 | Z4, Z6 |                     |    |
|     |     |     |     |      |      |      |      |      |      |      |      |      |      |      |     |     |     |     |      |      |      |      |      |      | Z1     | Z2     | O2+H+M => HO2+M     | 5  |
|     |     |     |     |      |      |      |      |      |      |      |      |      |      |      |     |     |     |     |      |      |      |      |      |      | Z3, Z5 | Z4, Z6 |                     |    |
|     |     |     |     |      |      |      |      |      |      |      |      |      |      |      |     |     |     |     |      |      |      |      |      |      | Z1     | Z2     | HO2+M => O2+H+M     | 6  |
|     |     |     |     |      |      |      |      |      |      |      |      |      |      |      |     |     |     |     |      |      |      |      |      |      | Z3, Z5 | Z4, Z6 |                     |    |
|     |     |     |     |      |      |      |      |      |      |      |      |      |      |      |     |     |     |     |      |      |      |      |      |      | Z1     | Z2     | O2+H+H2O => HO2+H2O | 7  |
|     |     |     |     |      |      |      |      |      |      |      |      |      |      |      |     |     |     |     |      |      |      |      |      |      | Z3, Z5 | Z4, Z6 |                     |    |
|     |     |     |     |      |      |      |      |      |      |      |      |      |      |      |     |     |     |     |      |      |      |      |      |      | Z1     | Z2     | HO2+H2O => O2+H+H2O | 8  |
|     |     |     |     |      |      |      |      |      |      |      |      |      |      |      |     |     |     |     |      |      |      |      |      |      | Z3, Z5 | Z4, Z6 |                     |    |
|     |     |     |     |      |      |      |      |      |      |      |      |      |      |      |     |     |     |     |      |      |      |      |      |      | Z1     | Z2     | O2+H => OH+O        | 9  |
|     |     |     |     |      |      |      |      |      |      |      |      |      |      |      |     |     |     |     |      |      |      |      |      |      | Z3, Z5 | Z4, Z6 |                     |    |
|     |     |     |     |      |      |      |      |      |      |      |      |      |      |      |     |     |     |     |      |      |      |      |      |      | Z1     | Z2     | OH+O => O2+H        | 10 |
|     |     |     |     |      |      |      |      |      |      |      |      |      |      |      |     |     |     |     |      |      |      |      |      |      | Z3, Z5 | Z4, Z6 |                     |    |
|     |     |     |     |      |      |      |      |      |      |      |      |      |      |      |     |     |     |     |      |      |      |      |      |      | Z1     | Z2     | H2O2+H => HO2+H2    | 11 |
|     |     |     |     |      |      |      |      |      |      |      |      |      |      |      |     |     |     |     |      |      |      |      |      |      | Z3, Z5 | Z4, Z6 |                     |    |
|     |     |     |     |      |      |      |      |      |      |      |      |      |      |      |     |     |     |     |      |      |      |      |      |      | Z1     | Z2     | HO2+H2 => H2O2+H    | 12 |
|     |     |     |     |      |      |      |      |      |      |      |      |      |      |      |     |     |     |     |      |      |      |      |      |      | Z3, Z5 | Z4, Z6 |                     |    |
|     |     |     |     |      |      |      |      |      |      |      |      |      |      |      |     |     |     |     |      |      |      |      |      |      | Z1     | Z2     | H2O2+H => OH+H2O    | 13 |
|     |     |     |     |      |      |      |      |      |      |      |      |      |      |      |     |     |     |     |      |      |      |      |      |      | Z3, Z5 | Z4, Z6 |                     |    |
|     |     |     |     |      |      |      |      |      |      |      |      |      |      |      |     |     |     |     |      |      |      |      |      |      | Z1     | Z2     | OH+H2O => H2O2+H    | 14 |
|     |     |     |     |      |      |      |      |      |      |      |      |      |      |      |     |     |     |     |      |      |      |      |      |      | Z3, Z5 | Z4, Z6 |                     |    |
|     |     |     |     |      |      |      |      |      |      |      |      |      |      |      |     |     |     |     |      |      |      |      |      |      | Z1     | Z2     | H2O2+O => OH+HO2    | 15 |
|     |     |     |     |      |      |      |      |      |      |      |      |      |      |      |     |     |     |     |      |      |      |      |      |      | Z3, Z5 | Z4, Z6 |                     |    |
|     |     |     |     |      |      |      |      |      |      |      |      |      |      |      |     |     |     |     |      |      |      |      |      |      | Z1     | Z2     | OH+HO2 => H2O2+O    | 16 |
|     |     |     |     |      |      |      |      |      |      |      |      |      |      |      |     |     |     |     |      |      |      |      |      |      | Z3, Z5 | Z4, Z6 |                     |    |
|     |     |     |     |      |      |      |      |      |      |      |      |      |      |      |     |     |     |     |      |      |      |      |      |      | Z1     | Z2     | H2O2+OH => H2O+HO2  | 17 |
|     |     |     |     |      |      |      |      |      |      |      |      |      |      |      |     |     |     |     |      |      |      |      |      |      | Z3, Z5 | Z4, Z6 |                     |    |
|     |     |     |     |      |      |      |      |      |      |      |      |      |      |      |     |     |     |     |      |      |      |      |      |      | Z1     | Z2     | H2O+HO2 => H2O2+OH  | 18 |
|     |     |     |     |      |      |      |      |      |      |      |      |      |      |      |     |     |     |     |      |      |      |      |      |      | Z3, Z5 | Z4, Z6 |                     |    |
|     |     |     |     |      |      |      |      |      |      |      |      |      |      |      |     |     |     |     |      |      |      |      |      |      | Z1     | Z2     | 2OH(+M) => H2O2(+M) | 19 |
|     |     |     |     |      |      |      |      |      |      |      |      |      |      |      |     |     |     |     |      |      |      |      |      |      | Z3, Z5 | Z4, Z6 |                     |    |
|     |     |     |     |      |      |      |      |      |      |      |      |      |      |      |     |     |     |     |      |      |      |      |      |      | Z1     | Z2     | H2O2(+M) => 2OH(+M) | 20 |
|     |     |     |     |      |      |      |      |      |      |      |      |      |      |      |     |     |     |     |      |      |      |      |      |      | Z3, Z5 | Z4, Z6 |                     |    |
|     |     |     |     |      |      |      |      |      |      |      |      |      |      |      |     |     |     |     |      |      |      |      |      |      | Z1     | Z2     | 2H+M => H2+M        | 21 |
|     |     |     |     |      |      |      |      |      |      |      |      |      |      |      |     |     |     |     |      |      |      |      |      |      | Z3, Z5 | Z4, Z6 |                     |    |
|     |     |     |     |      |      |      |      |      |      |      |      |      |      |      |     |     |     |     |      |      |      |      |      |      | Z1     | Z2     | H2+M => 2H+M        | 22 |
|     |     |     |     |      |      |      |      |      |      |      |      |      |      |      |     |     |     |     |      |      |      |      |      |      | Z3, Z5 | Z4, Z6 |                     |    |
|     |     |     |     |      |      |      |      |      |      |      |      |      |      |      |     |     |     |     |      |      |      |      |      |      | Z1     | Z2     | 2H+H2 => 2H2        | 23 |
|     |     |     |     |      |      |      |      |      |      |      |      |      |      |      |     |     |     |     |      |      |      |      |      |      | Z3, Z5 | Z4, Z6 |                     |    |

|                                                                                                    |                                                                 |  |  |  |  |  |  |  |  |     |  |  |  |  |  |  |  |  |  |        |                                |    |
|----------------------------------------------------------------------------------------------------|-----------------------------------------------------------------|--|--|--|--|--|--|--|--|-----|--|--|--|--|--|--|--|--|--|--------|--------------------------------|----|
|                                                                                                    |                                                                 |  |  |  |  |  |  |  |  |     |  |  |  |  |  |  |  |  |  | Z1     |                                |    |
|                                                                                                    |                                                                 |  |  |  |  |  |  |  |  |     |  |  |  |  |  |  |  |  |  | Z2     |                                |    |
|                                                                                                    |                                                                 |  |  |  |  |  |  |  |  |     |  |  |  |  |  |  |  |  |  | Z3, Z5 | $2H_2 \Rightarrow 2H+H_2$      | 24 |
|                                                                                                    |                                                                 |  |  |  |  |  |  |  |  |     |  |  |  |  |  |  |  |  |  | Z4, Z6 |                                |    |
|                                                                                                    |                                                                 |  |  |  |  |  |  |  |  |     |  |  |  |  |  |  |  |  |  | Z1     |                                |    |
|                                                                                                    |                                                                 |  |  |  |  |  |  |  |  |     |  |  |  |  |  |  |  |  |  | Z2     |                                |    |
|                                                                                                    |                                                                 |  |  |  |  |  |  |  |  |     |  |  |  |  |  |  |  |  |  | Z3, Z5 | $H+O+M \Rightarrow OH+M$       | 25 |
|                                                                                                    |                                                                 |  |  |  |  |  |  |  |  |     |  |  |  |  |  |  |  |  |  | Z4, Z6 |                                |    |
|                                                                                                    |                                                                 |  |  |  |  |  |  |  |  |     |  |  |  |  |  |  |  |  |  | Z1     |                                |    |
|                                                                                                    |                                                                 |  |  |  |  |  |  |  |  |     |  |  |  |  |  |  |  |  |  | Z2     |                                |    |
|                                                                                                    |                                                                 |  |  |  |  |  |  |  |  |     |  |  |  |  |  |  |  |  |  | Z3, Z5 | $OH+M \Rightarrow H+O+M$       | 26 |
|                                                                                                    |                                                                 |  |  |  |  |  |  |  |  |     |  |  |  |  |  |  |  |  |  | Z4, Z6 |                                |    |
|                                                                                                    |                                                                 |  |  |  |  |  |  |  |  |     |  |  |  |  |  |  |  |  |  | Z1     |                                |    |
|                                                                                                    |                                                                 |  |  |  |  |  |  |  |  |     |  |  |  |  |  |  |  |  |  | Z2     |                                |    |
|                                                                                                    |                                                                 |  |  |  |  |  |  |  |  |     |  |  |  |  |  |  |  |  |  | Z3, Z5 | $H+OH+M \Rightarrow H_2O+M$    | 27 |
|                                                                                                    |                                                                 |  |  |  |  |  |  |  |  |     |  |  |  |  |  |  |  |  |  | Z4, Z6 |                                |    |
|                                                                                                    |                                                                 |  |  |  |  |  |  |  |  |     |  |  |  |  |  |  |  |  |  | Z1     |                                |    |
|                                                                                                    |                                                                 |  |  |  |  |  |  |  |  |     |  |  |  |  |  |  |  |  |  | Z2     |                                |    |
|                                                                                                    |                                                                 |  |  |  |  |  |  |  |  |     |  |  |  |  |  |  |  |  |  | Z3, Z5 | $H_2O+M \Rightarrow H+OH+M$    | 28 |
|                                                                                                    |                                                                 |  |  |  |  |  |  |  |  |     |  |  |  |  |  |  |  |  |  | Z4, Z6 |                                |    |
|                                                                                                    |                                                                 |  |  |  |  |  |  |  |  |     |  |  |  |  |  |  |  |  |  | Z1     |                                |    |
|                                                                                                    |                                                                 |  |  |  |  |  |  |  |  |     |  |  |  |  |  |  |  |  |  | Z2     |                                |    |
|                                                                                                    |                                                                 |  |  |  |  |  |  |  |  |     |  |  |  |  |  |  |  |  |  | Z3, Z5 | $H+H_2 \Rightarrow H_2+O_2$    | 29 |
|                                                                                                    |                                                                 |  |  |  |  |  |  |  |  |     |  |  |  |  |  |  |  |  |  | Z4, Z6 |                                |    |
|                                                                                                    |                                                                 |  |  |  |  |  |  |  |  |     |  |  |  |  |  |  |  |  |  | Z1     |                                |    |
|                                                                                                    |                                                                 |  |  |  |  |  |  |  |  |     |  |  |  |  |  |  |  |  |  | Z2     |                                |    |
|                                                                                                    |                                                                 |  |  |  |  |  |  |  |  |     |  |  |  |  |  |  |  |  |  | Z3, Z5 | $H_2+O_2 \Rightarrow H+H_2$    | 30 |
|                                                                                                    |                                                                 |  |  |  |  |  |  |  |  |     |  |  |  |  |  |  |  |  |  | Z4, Z6 |                                |    |
|                                                                                                    |                                                                 |  |  |  |  |  |  |  |  |     |  |  |  |  |  |  |  |  |  | Z1     |                                |    |
|                                                                                                    |                                                                 |  |  |  |  |  |  |  |  |     |  |  |  |  |  |  |  |  |  | Z2     |                                |    |
|                                                                                                    |                                                                 |  |  |  |  |  |  |  |  |     |  |  |  |  |  |  |  |  |  | Z3, Z5 | $H+H_2 \Rightarrow 2OH$        | 31 |
|                                                                                                    |                                                                 |  |  |  |  |  |  |  |  |     |  |  |  |  |  |  |  |  |  | Z4, Z6 |                                |    |
|                                                                                                    |                                                                 |  |  |  |  |  |  |  |  |     |  |  |  |  |  |  |  |  |  | Z1     |                                |    |
|                                                                                                    |                                                                 |  |  |  |  |  |  |  |  |     |  |  |  |  |  |  |  |  |  | Z2     |                                |    |
|                                                                                                    |                                                                 |  |  |  |  |  |  |  |  |     |  |  |  |  |  |  |  |  |  | Z3, Z5 | $2OH \Rightarrow H+H_2$        | 32 |
|                                                                                                    |                                                                 |  |  |  |  |  |  |  |  |     |  |  |  |  |  |  |  |  |  | Z4, Z6 |                                |    |
|                                                                                                    |                                                                 |  |  |  |  |  |  |  |  |     |  |  |  |  |  |  |  |  |  | Z1     |                                |    |
|                                                                                                    |                                                                 |  |  |  |  |  |  |  |  |     |  |  |  |  |  |  |  |  |  | Z2     |                                |    |
|                                                                                                    |                                                                 |  |  |  |  |  |  |  |  |     |  |  |  |  |  |  |  |  |  | Z3, Z5 | $H+H_2 \Rightarrow H_2O+O$     | 33 |
|                                                                                                    |                                                                 |  |  |  |  |  |  |  |  |     |  |  |  |  |  |  |  |  |  | Z4, Z6 |                                |    |
|                                                                                                    |                                                                 |  |  |  |  |  |  |  |  |     |  |  |  |  |  |  |  |  |  | Z1     |                                |    |
|                                                                                                    |                                                                 |  |  |  |  |  |  |  |  |     |  |  |  |  |  |  |  |  |  | Z2     |                                |    |
|                                                                                                    |                                                                 |  |  |  |  |  |  |  |  |     |  |  |  |  |  |  |  |  |  | Z3, Z5 | $H_2O+O \Rightarrow H+H_2$     | 34 |
|                                                                                                    |                                                                 |  |  |  |  |  |  |  |  |     |  |  |  |  |  |  |  |  |  | Z4, Z6 |                                |    |
|                                                                                                    |                                                                 |  |  |  |  |  |  |  |  |     |  |  |  |  |  |  |  |  |  | Z1     |                                |    |
|                                                                                                    |                                                                 |  |  |  |  |  |  |  |  |     |  |  |  |  |  |  |  |  |  | Z2     |                                |    |
|                                                                                                    |                                                                 |  |  |  |  |  |  |  |  |     |  |  |  |  |  |  |  |  |  | Z3, Z5 | $2O+M \Rightarrow O_2+M$       | 35 |
|                                                                                                    |                                                                 |  |  |  |  |  |  |  |  |     |  |  |  |  |  |  |  |  |  | Z4, Z6 |                                |    |
|                                                                                                    |                                                                 |  |  |  |  |  |  |  |  |     |  |  |  |  |  |  |  |  |  | Z1     |                                |    |
|                                                                                                    |                                                                 |  |  |  |  |  |  |  |  |     |  |  |  |  |  |  |  |  |  | Z2     |                                |    |
|                                                                                                    |                                                                 |  |  |  |  |  |  |  |  |     |  |  |  |  |  |  |  |  |  | Z3, Z5 | $O_2+M \Rightarrow 2O+M$       | 36 |
|                                                                                                    |                                                                 |  |  |  |  |  |  |  |  |     |  |  |  |  |  |  |  |  |  | Z4, Z6 |                                |    |
|                                                                                                    |                                                                 |  |  |  |  |  |  |  |  |     |  |  |  |  |  |  |  |  |  | Z1     |                                |    |
|                                                                                                    |                                                                 |  |  |  |  |  |  |  |  |     |  |  |  |  |  |  |  |  |  | Z2     |                                |    |
|                                                                                                    |                                                                 |  |  |  |  |  |  |  |  |     |  |  |  |  |  |  |  |  |  | Z3, Z5 | $O+H_2 \Rightarrow O_2+OH$     | 37 |
|                                                                                                    |                                                                 |  |  |  |  |  |  |  |  |     |  |  |  |  |  |  |  |  |  | Z4, Z6 |                                |    |
|                                                                                                    |                                                                 |  |  |  |  |  |  |  |  |     |  |  |  |  |  |  |  |  |  | Z1     |                                |    |
|                                                                                                    |                                                                 |  |  |  |  |  |  |  |  |     |  |  |  |  |  |  |  |  |  | Z2     |                                |    |
|                                                                                                    |                                                                 |  |  |  |  |  |  |  |  |     |  |  |  |  |  |  |  |  |  | Z3, Z5 | $O_2+OH \Rightarrow O+H_2$     | 38 |
|                                                                                                    |                                                                 |  |  |  |  |  |  |  |  |     |  |  |  |  |  |  |  |  |  | Z4, Z6 |                                |    |
|                                                                                                    |                                                                 |  |  |  |  |  |  |  |  |     |  |  |  |  |  |  |  |  |  | Z1     |                                |    |
|                                                                                                    |                                                                 |  |  |  |  |  |  |  |  |     |  |  |  |  |  |  |  |  |  | Z2     |                                |    |
|                                                                                                    |                                                                 |  |  |  |  |  |  |  |  |     |  |  |  |  |  |  |  |  |  | Z3, Z5 | $2OH \Rightarrow O+H_2$        | 39 |
|                                                                                                    |                                                                 |  |  |  |  |  |  |  |  |     |  |  |  |  |  |  |  |  |  | Z4, Z6 |                                |    |
|                                                                                                    |                                                                 |  |  |  |  |  |  |  |  |     |  |  |  |  |  |  |  |  |  | Z1     |                                |    |
|                                                                                                    |                                                                 |  |  |  |  |  |  |  |  |     |  |  |  |  |  |  |  |  |  | Z2     |                                |    |
|                                                                                                    |                                                                 |  |  |  |  |  |  |  |  |     |  |  |  |  |  |  |  |  |  | Z3, Z5 | $O+H_2 \Rightarrow 2OH$        | 40 |
|                                                                                                    |                                                                 |  |  |  |  |  |  |  |  |     |  |  |  |  |  |  |  |  |  | Z4, Z6 |                                |    |
|                                                                                                    |                                                                 |  |  |  |  |  |  |  |  |     |  |  |  |  |  |  |  |  |  | Z1     |                                |    |
|                                                                                                    |                                                                 |  |  |  |  |  |  |  |  |     |  |  |  |  |  |  |  |  |  | Z2     |                                |    |
|                                                                                                    |                                                                 |  |  |  |  |  |  |  |  |     |  |  |  |  |  |  |  |  |  | Z3, Z5 | $OH+H_2 \Rightarrow H_2O+O_2$  | 41 |
|                                                                                                    |                                                                 |  |  |  |  |  |  |  |  |     |  |  |  |  |  |  |  |  |  | Z4, Z6 |                                |    |
|                                                                                                    |                                                                 |  |  |  |  |  |  |  |  |     |  |  |  |  |  |  |  |  |  | Z1     |                                |    |
|                                                                                                    |                                                                 |  |  |  |  |  |  |  |  |     |  |  |  |  |  |  |  |  |  | Z2     |                                |    |
|                                                                                                    |                                                                 |  |  |  |  |  |  |  |  |     |  |  |  |  |  |  |  |  |  | Z3, Z5 | $H_2O+O_2 \Rightarrow OH+H_2$  | 42 |
|                                                                                                    |                                                                 |  |  |  |  |  |  |  |  |     |  |  |  |  |  |  |  |  |  | Z4, Z6 |                                |    |
|                                                                                                    |                                                                 |  |  |  |  |  |  |  |  |     |  |  |  |  |  |  |  |  |  | Z1     |                                |    |
|                                                                                                    |                                                                 |  |  |  |  |  |  |  |  |     |  |  |  |  |  |  |  |  |  | Z2     |                                |    |
|                                                                                                    |                                                                 |  |  |  |  |  |  |  |  |     |  |  |  |  |  |  |  |  |  | Z3, Z5 | $2HO_2 \Rightarrow H_2O_2+O_2$ | 43 |
|                                                                                                    |                                                                 |  |  |  |  |  |  |  |  |     |  |  |  |  |  |  |  |  |  | Z4, Z6 |                                |    |
|                                                                                                    |                                                                 |  |  |  |  |  |  |  |  |     |  |  |  |  |  |  |  |  |  | Z1     |                                |    |
|                                                                                                    |                                                                 |  |  |  |  |  |  |  |  |     |  |  |  |  |  |  |  |  |  | Z2     |                                |    |
|                                                                                                    |                                                                 |  |  |  |  |  |  |  |  |     |  |  |  |  |  |  |  |  |  | Z3, Z5 | $H_2O_2+O_2 \Rightarrow 2HO_2$ | 44 |
|                                                                                                    |                                                                 |  |  |  |  |  |  |  |  |     |  |  |  |  |  |  |  |  |  | Z4, Z6 |                                |    |
|                                                                                                    |                                                                 |  |  |  |  |  |  |  |  |     |  |  |  |  |  |  |  |  |  | Z1     |                                |    |
|                                                                                                    |                                                                 |  |  |  |  |  |  |  |  |     |  |  |  |  |  |  |  |  |  | Z2     |                                |    |
|                                                                                                    |                                                                 |  |  |  |  |  |  |  |  |     |  |  |  |  |  |  |  |  |  | Z3, Z5 | $2HO_2 \Rightarrow H_2O_2+O_2$ | 45 |
|                                                                                                    |                                                                 |  |  |  |  |  |  |  |  |     |  |  |  |  |  |  |  |  |  | Z4, Z6 |                                |    |
|                                                                                                    |                                                                 |  |  |  |  |  |  |  |  |     |  |  |  |  |  |  |  |  |  | Z1     |                                |    |
|                                                                                                    |                                                                 |  |  |  |  |  |  |  |  |     |  |  |  |  |  |  |  |  |  | Z2     |                                |    |
|                                                                                                    |                                                                 |  |  |  |  |  |  |  |  |     |  |  |  |  |  |  |  |  |  | Z3, Z5 | $H_2O_2+O_2 \Rightarrow 2HO_2$ | 46 |
|                                                                                                    |                                                                 |  |  |  |  |  |  |  |  |     |  |  |  |  |  |  |  |  |  | Z4, Z6 |                                |    |
| 600 : 700 : 800 : 900 : 1000 : 1100 : 1200 : 1300 : 1400 : 1500 : 1600 : 1700 : 1800 : 1900 : 2000 | 600 : 700 : 800 : 900 : 1000 : 1100 : 1200 : 1300 : 1400 : 1500 |  |  |  |  |  |  |  |  |     |  |  |  |  |  |  |  |  |  |        |                                |    |
| 2.0                                                                                                |                                                                 |  |  |  |  |  |  |  |  | 4.0 |  |  |  |  |  |  |  |  |  |        |                                |    |

Electronic Supplement to article:

The influence of thermal coupling and diffusion on the importance of reactions:  
The case study of hydrogen–air combustion  
(authors István Gy. Zsély and Tamás Turányi)

The rows of the table belong to the reactions of the hydrogen combustion mechanism. The four lines in each row belong to combustion models Z1, Z2, Z3/Z5, and Z4/Z6. Definition of the models is given in the text. The columns belong to model temperatures in 100 K steps and are grouped according to fuel-to-air ratios  $\varphi=0.5, 1.0, 2.0,$  and  $4.0$ . Yellow shading means that this temperature is not attainable by the corresponding model. Grey shading means that the corresponding reaction was found important by the PCAF method at the corresponding temperature, fuel-to-air ratio, and combustion model.
